# Supplementary material
Source: publisher figshare collection journal article supplement (https://tandf.figshare.com/ndownloader/files/36015304)
Supplement: Supplementary file 1 [file 36015304]

## Technical Appendix A: Vehicular ordinance types by city.

| City          | Category  | Year | Ordinance                                                                                                                                             |
|---------------|-----------|------|-------------------------------------------------------------------------------------------------------------------------------------------------------|
| Agoura Hills  | Zone      | 2013 | 3201. - Oversize vehicles; parking within residential zone.                                                                                           |
| Alhambra      | Overnight | 1986 | § 11.36.010 Hours When Parking Restricted.                                                                                                            |
| Arcadia       | Permit    | 1996 | 3214.3. - Section 11.11 Annual All Night Street Parking Permit.                                                                                       |
| Artesia       | Three-Day | 2014 | 4-4.105 Amendment: Section 15.64.100: Trailers or Semitrailers—Parking Requirements.                                                                  |
| Avalon        | Permit    | 2013 | 4-4.1703 (d) Temporary Vehicle Permits                                                                                                                |
| Azusa         | Citywide  | 2010 | Sec. 74-439.1. - Sleeping in vehicles is prohibited.                                                                                                  |
| Baldwin Park  | Three-Day | 1983 | § 72.05 Use of Streets for Storage of Vehicles Prohibited.                                                                                            |
| Bell          | None      | N/A  | N/A                                                                                                                                                   |
| Bell Gardens  | Citywide  | 2005 | 13.20.320 Prohibition on parking of vehicles on public property for purposes of habitation.                                                           |
| Bellflower    | Overnight | 2017 | 10.12.070 Recreational Vehicle and Recreational Trailer Overnight Parking.                                                                            |
| Beverly Hills | Overnight | 1999 | 7-3-301: Overnight Parking Prohibited with Certain Exceptions                                                                                         |
| Bradbury      | Permit    | 2021 | Sec. 4.01.1050. - The parking of oversize vehicles on public streets.                                                                                 |
| Burbank       | Citywide  | 2015 | 6-1-1015: Parking on Public Property; Parking in Electric Vehicle Spaces                                                                              |
| Calabasas     | Citywide  | 2017 | 10.22.030 - Parking Restrictions.                                                                                                                     |
| Carson        | Citywide  | 2018 | 3255.2 Oversized Vehicle Parking Prohibited (Ord. 18-1815, § 2)                                                                                       |
| Cerritos      | Permit    | 2021 | 10.02.040 Section 3218 added—Parking.                                                                                                                 |
| Claremont     | Overnight | 2021 | 10.32.210 Nighttime parking restricted—Exception.                                                                                                     |
| Commerce      | Citywide  | 2020 | 10.44.140 - Unlawful parking of vehicles, including vehicles parked, stopped or standing on public right-of-ways that are used for dwelling purposes. |
| Compton       | Citywide  | 2019 | § 7-20.6. Living and/or Sleeping in Vehicles on Public Property. [Ord. #2285; amended 7-2-2019 by Ord. No. 2313]                                      |
| Covina        | Three-Day | 2004 | 10.32.170 Parking for more than 72 consecutive hours prohibited.                                                                                      |
| Cudahy        | Permit    | 2018 | 10.04.040 All-night parking – Exceptions.                                                                                                             |
| Culver City   | Citywide  | 2005 | § 7.03.242 Regulating Vehicle Habitation on Public Streets and Other Public Property                                                                  |

| City                 | Category  | Year | Ordinance                                                                                             |
|----------------------|-----------|------|-------------------------------------------------------------------------------------------------------|
| Diamond Bar          | Overnight | 2017 | Section 10.16.215. - Overnight parking in City-owned parking lots.                                    |
| Downey               | Overnight | 2018 | SECTION 3182. Parking of Vehicles Prohibited—All Night Parking                                        |
| Duarte               | Overnight | 1972 | 11.13.010 - All-night street parking restricted.                                                      |
| El Monte             | Zone      | 2007 | 10.16.020 - Public street sweeping—No parking hours.                                                  |
| El Segundo           | Three-Day | 2017 | 8-5-6: Parking Time Limits                                                                            |
| Gardena              | Overnight | 2012 | 10.28.490 Use of vehicles for human habitation prohibited.                                            |
| Glendora             | Three-Day | 1993 | 10.12.040 Prohibiting parking for more than seventy-two consecutive hours.                            |
| Hawaiian Gardens     | Citywide  | 2009 | 10.36.020 - Camping prohibited.                                                                       |
| Hawthorne            | Citywide  | 2009 | 10.87.020 Use or occupancy for sleeping purposes prohibited.                                          |
| Hermosa Beach        | Three-Day | 2021 | 10.32.120 Parking in excess of seventy-two (72) consecutive hours prohibited.                         |
| Hidden Hills         | Overnight | 2018 | SECTION 3 Traffic, Vehicles and Parking; Section 3.4(c) Overnight Parking                             |
| Huntington Park      | None      | N/A  | N/A                                                                                                   |
| Industry             | None      | N/A  | N/A                                                                                                   |
| Inglewood            | Citywide  | 2018 | Section 3-65.4. Recreational Vehicle Parking Restrictions.                                            |
| Irwindale            | Zone      | 2020 | 10.28.182 - Overnight parking restricted on designated streets.                                       |
| La Cañada Flintridge | Overnight | 2005 | 4.04.080 Overnight parking prohibited.                                                                |
| La Habra Heights     | Overnight | 2021 | 6.5.20 On-Street Parking Prohibition                                                                  |
| La Mirada            | Overnight | 1963 | 10.16.020 Vehicle restrictions.                                                                       |
| La Puente            | Citywide  | 2015 | 10.10.040 Recreational Vehicle Parking.                                                               |
| La Verne             | Overnight | 1986 | 10.40.210 All-night parking prohibited—Exception.                                                     |
| Lakewood             | Overnight | 2013 | 3250.2. Stopping, Standing and Parking Prohibited                                                     |
| Lancaster            | None      | N/A  | N/A                                                                                                   |
| Lawndale             | Citywide  | 2021 | 10.08.025 Prohibition on parking recreational vehicles within the city—Exceptions.                    |
| Lomita               | Zone      | 2007 | Sec. 8-5.02. - Parking overnight in the public parking portion of city parks and city hall prohibited |
| Los Angeles          | Zone      | 2020 | “Safe Parking” LAMC 85.02                                                                             |

| City                  | Category  | Year | Ordinance                                                                                                                         |
|-----------------------|-----------|------|-----------------------------------------------------------------------------------------------------------------------------------|
| Lynwood               | Citywide  | 2020 | 7-17 Restrictions on Use of Streets by Overweight and Oversize Vehicles                                                           |
| Malibu                | Citywide  | 2001 | 9.08.090 Camping, lodging, sleeping overnight on public property                                                                  |
| Manhattan Beach       | Overnight | 1985 | 14.36.160 - Prohibition of overnight camping.                                                                                     |
| Maywood               | Overnight | 2006 | 4-3.101 - Permits—Required—Exceptions.                                                                                            |
| Monrovia              | Permit    | 2016 | § 10.16.085 Parking Prohibited on Designated Streets                                                                              |
| Montebello            | Citywide  | 2006 | 10.68.010 - Prohibition of parking of oversized vehicles.                                                                         |
| Monterey Park         | Zone      | 1997 | 10.48.205 Overnight parking restrictions in business districts from two a.m. to five a.m.                                         |
| Norwalk               | Three-Day | 2004 | 10.08.200 Parking of vehicles in excess of seventy-two consecutive hours prohibited                                               |
| Palmdale              | Three-Day | 2006 | 10.04.150 Chapter 15.130 added – Prohibiting the parking of recreational vehicles in residential districts for more than 72 hours |
| Palos Verdes Estates  | Citywide  | 1977 | 12.20.030 Overnight camping on street or alley                                                                                    |
| Paramount             | Citywide  | 2021 | 10.12.070 Recreational and commercial vehicle parking regulations.                                                                |
| Pico Rivera           | Overnight | 2017 | 10.80.010 Prohibition of parking of oversized vehicles.                                                                           |
| Pomona                | Citywide  | 2002 | Sec. 46-605. - Sleeping in motor vehicles.                                                                                        |
| Rancho Palos Verdes   | Overnight | 2009 | 10.36.020 - Restrictions on parking of oversized vehicles.                                                                        |
| Redondo Beach         | Overnight | 2010 | 3-7.2102 Overnight parking prohibition.                                                                                           |
| Rolling Hills         | Three-Day | 1996 | 10.52.250 - Parking over seventy-two hours prohibited.                                                                            |
| Rolling Hills Estates | Overnight | 2011 | 10.24.090 - All night parking.                                                                                                    |
| Rosemead              | Zone      | 1996 | 10.12.040 - Parking prohibited at all times.                                                                                      |
| San Dimas             | Overnight | 1994 | 10.24.010 Hours prohibited                                                                                                        |
| San Fernando          | Overnight | 2004 | Sec. 90-217. - Overnight parking.                                                                                                 |
| San Gabriel           | Permit    | 2021 | § 72.033 Vehicles for Which Permits Shall not be Issued; Exemptions                                                               |
| San Marino            | Overnight | 2009 | 15.07.23: Prohibited Parking at Night                                                                                             |

| <b>City</b>                    | <b>Category</b> | <b>Year</b> | <b>Ordinance</b>                                                                                                                  |
|--------------------------------|-----------------|-------------|-----------------------------------------------------------------------------------------------------------------------------------|
| Santa Clarita                  | Citywide        | 2001        | 12.94.020 Oversized Vehicle Parking Regulations—Penalties—Appeals                                                                 |
| Santa Fe Springs               | Three-Day       | 2021        | § 72.04 Parking Vehicles in Excess of 72 Consecutive Hours Prohibited; Removal by Chief of Police                                 |
| Santa Monica                   | Permit          | 2018        | 3.12.900 Overnight parking permits for oversized vehicles                                                                         |
| Sierra Madre                   | Zone            | 2020        | 10.24.310 - Parking commercial and recreational vehicles in residential districts                                                 |
| Signal Hill                    | Three-Day       | 1965        | 10.28.050 Seventy-two-hour limit                                                                                                  |
| South El Monte                 | Permit          | 1986        | 10.20.130 Temporary all-night street parking                                                                                      |
| South Gate                     | Citywide        | 1995        | 8.12.040 Violations                                                                                                               |
| South Pasadena                 | Overnight       | 2016        | 19.58 Required                                                                                                                    |
| Temple City                    | Permit          | 2021        | 3-3A-50-1: Prohibition on Public Streets                                                                                          |
| Torrance                       | Permit          | 2006        | Ordinance No. 3686                                                                                                                |
| Unincorporated Los Angeles CoC | Three-Day       | 1954        | 15.64.180 - Parking in certain places prohibited—Exceptions                                                                       |
| Vernon                         | Three-Day       | 2021        | Sec. 16.24. Improper and prohibited parking or storage of vehicles; improper and prohibited use of vehicles for human habitation. |
| Walnut                         | Zone            | 2021        | Chapter 3.32 Motor Vehicles and Traffic                                                                                           |
| West Covina                    | Overnight       | 1995        | Sec. 22-175. - Overnight parking restrictions in limited areas                                                                    |
| West Hollywood                 | Permit          | 2021        | Chapter 10.07 Parking Code                                                                                                        |
| Westlake Village               | Citywide        | 2006        | 3.2.020. - Commercial and Oversize Vehicle Parking                                                                                |
| Whittier                       | Overnight       | 2021        | 10.16.140 - All-night parking prohibited.                                                                                         |
